# Supplementary material for: Analysis of the current status of knowledge, attitudes, and practices among stroke-related healthcare professionals in the treatment of shoulder pain in hemiplegic patients
Source: PeerJ. 2024 Dec 16;12:e18684. doi: 10.7717/peerj.18684 (PMC11657197; doi:10.7717/peerj.18684)
Supplement: Supplemental Information 1 [file peerj-12-18684-s001.xlsx]

## Sheet: Sheet1
Serial Number	Total Score	1. What is your gender:	1. What department do you work in:	1. What is your year of employment:	1. What is your professional title:	1. What is your position (doctor, nursing, etc.):	1. How many years have you worked in your current department:	1. What is your level of education:	2. Do you know what situations can cause hemiplegic shoulder pain?	3. Do you know the incidence rate of hemiplegic shoulder pain?	4. Do you know about the proper positioning of the unaffected limb?	5. Do you know how to position the hemiplegic upper limb when sitting or standing?	6. Do you know how to determine if a patient has a shoulder dislocation?	7. Do you know the definition of shoulder-hand syndrome?	8. Do you know how to alleviate hemiplegic shoulder pain?	9. Do you know the timing for wearing a shoulder support?	10. Do you know the timing for applying medication for pain relief with a hemiplegic shoulder support?	11. Do you think rehabilitation education is meaningful?	12. Are you willing to educate patients on proper limb positioning?	13. Are you willing to instruct patients on wearing a shoulder support?	14. If you see patients wearing a shoulder support incorrectly, are you willing to correct it?	15. Do you think it is necessary to participate in learning about hemiplegic shoulder pain knowledge?	16. Are you willing to provide psychological counseling for patients with hemiplegic shoulder pain?	17. Do you guide patients on proper limb positioning in your work?	18. Do you instruct patients on wearing a shoulder support in your work?	19. If you see patients wearing a shoulder support incorrectly in your work, are you willing to correct it?	20. Do you assess the muscle strength on the hemiplegic side of patients in your work?	21. Do you assess the swelling of the hemiplegic limb in patients in your work?	22. Do you assess the pain of the hemiplegic limb in patients in your work?	23. Do you provide psychological counseling for patients with hemiplegic shoulder pain?	24. Do you treat patients with hemiplegic shoulder pain?
1	110	female	Department of Rehabilitation Medicine	2015	Resident Physician	Physician	8	Bachelor's Degree	Complete Mastery	Understood	Complete Mastery	Complete Mastery	Complete Mastery	Complete Mastery	Complete Mastery	Complete Mastery	Complete Mastery	Completely Agree	Completely Willing	Completely Willing	Completely Willing	Willing	Willing	Always	Always	Always	Always	Always	Always	Often	Always
2	64	female	Department of Rehabilitation Medicine	2022	Registered Nurse	Nurse	0.6	Associate Degree	Partial Understanding	Not at all familiar	Familiar	Familiar	Partial Understanding	Understood	Partial Understanding	Not at all familiar	Not at all familiar	Completely Agree	Completely Willing	Completely Willing	Completely Willing	Completely Willing	Completely Willing	Occasionally	Never	Never	Never	Sometimes	Occasionally	Occasionally	Occasionally
3	80	female	Department of Rehabilitation Medicine	2007	Charge Nurse	Nurse	15	Bachelor's Degree	Partial Understanding	Partial Understanding	Complete Mastery	Familiar	Partial Understanding	Familiar	Understood	Partial Understanding	Partial Understanding	Agree	Willing	Willing	Willing	Willing	Willing	Often	Sometimes	Sometimes	Often	Often	Often	Often	Often
4	93	female	Department of Rehabilitation Medicine	2021	Junior Technician	Therapist	1	Bachelor's Degree	Familiar	Familiar	Complete Mastery	Complete Mastery	Familiar	Familiar	Familiar	Understood	Understood	Completely Agree	Completely Willing	Completely Willing	Completely Willing	Completely Willing	Completely Willing	Sometimes	Sometimes	Sometimes	Often	Often	Often	Sometimes	Sometimes
5	104	female	Department of Rehabilitation Medicine	2009	Intermediate Technician	Therapist	8	Bachelor's Degree	Complete Mastery	Familiar	Complete Mastery	Complete Mastery	Complete Mastery	Complete Mastery	Complete Mastery	Complete Mastery	Understood	Completely Agree	Completely Willing	Completely Willing	Completely Willing	Completely Willing	Completely Willing	Often	Often	Often	Often	Often	Often	Often	Often
6	106	female	Department of Rehabilitation Medicine	2020	Junior Technician	Therapist	2	Associate Degree	Familiar	Familiar	Complete Mastery	Complete Mastery	Familiar	Familiar	Familiar	Familiar	Familiar	Completely Agree	Completely Willing	Completely Willing	Completely Willing	Completely Willing	Completely Willing	Often	Often	Always	Always	Always	Always	Always	Always
7	100	male	Department of Rehabilitation Medicine	2017	Junior Technician	Therapist	6	Bachelor's Degree	Familiar	Familiar	Complete Mastery	Familiar	Complete Mastery	Complete Mastery	Familiar	Complete Mastery	Understood	Agree	Willing	Completely Willing	Willing	Willing	Willing	Often	Always	Always	Always	Often	Often	Often	Always
8	84	female	Department of Rehabilitation Medicine	2011	Charge Nurse	Nurse	4	Bachelor's Degree	Familiar	Understood	Familiar	Complete Mastery	Understood	Familiar	Understood	Familiar	Understood	Completely Agree	Willing	Willing	Willing	Willing	Willing	Often	Sometimes	Sometimes	Often	Often	Sometimes	Sometimes	Occasionally
9	95	female	Department of Rehabilitation Medicine	2015	Junior Technician	Therapist	7	Bachelor's Degree	Familiar	Familiar	Familiar	Familiar	Familiar	Familiar	Understood	Familiar	Understood	Completely Agree	Completely Willing	Completely Willing	Completely Willing	Completely Willing	Completely Willing	Often	Often	Often	Often	Often	Often	Sometimes	Often
10	96	female	Department of Rehabilitation Medicine	1995	Associate Professor in Nursing	Nurse	7	Bachelor's Degree	Familiar	Understood	Complete Mastery	Complete Mastery	Familiar	Familiar	Familiar	Complete Mastery	Understood	Completely Agree	Completely Willing	Completely Willing	Willing	Willing	Willing	Often	Often	Often	Always	Often	Often	Sometimes	Often
11	98	male	Department of Rehabilitation Medicine	2013	Intermediate Technician	Therapist	10	Bachelor's Degree	Familiar	Complete Mastery	Complete Mastery	Familiar	Familiar	Complete Mastery	Familiar	Familiar	Understood	Completely Agree	Completely Willing	Completely Willing	Completely Willing	Completely Willing	Completely Willing	Often	Often	Often	Often	Often	Often	Sometimes	Sometimes
12	97	male	Department of Rehabilitation Medicine	2010	Intermediate Technician	Therapist	13	Bachelor's Degree	Familiar	Familiar	Complete Mastery	Complete Mastery	Familiar	Familiar	Understood	Familiar	Understood	Completely Agree	Completely Willing	Completely Willing	Completely Willing	Willing	Willing	Often	Often	Often	Always	Often	Often	Often	Often
13	113	female	Department of Rehabilitation Medicine	2013	Junior Technician	Therapist	6	Bachelor's Degree	Familiar	Familiar	Complete Mastery	Complete Mastery	Complete Mastery	Complete Mastery	Complete Mastery	Complete Mastery	Complete Mastery	Completely Agree	Completely Willing	Completely Willing	Completely Willing	Completely Willing	Completely Willing	Always	Always	Always	Always	Always	Always	Always	Always
14	109	female	Department of Rehabilitation Medicine	2012	Intermediate Technician	Therapist	11	Bachelor's Degree	Complete Mastery	Complete Mastery	Complete Mastery	Complete Mastery	Complete Mastery	Complete Mastery	Complete Mastery	Complete Mastery	Complete Mastery	Completely Agree	Completely Willing	Completely Willing	Completely Willing	Completely Willing	Completely Willing	Often	Often	Often	Often	Always	Often	Often	Always
15	114	female	Department of Rehabilitation Medicine	2015	Resident Physician	Physician	7	Bachelor's Degree	Complete Mastery	Complete Mastery	Complete Mastery	Complete Mastery	Complete Mastery	Complete Mastery	Complete Mastery	Complete Mastery	Complete Mastery	Completely Agree	Completely Willing	Completely Willing	Completely Willing	Completely Willing	Completely Willing	Always	Often	Always	Always	Always	Always	Always	Always
16	112	female	Department of Rehabilitation Medicine	2012	Junior Technician	Therapist	12	Bachelor's Degree	Complete Mastery	Complete Mastery	Complete Mastery	Complete Mastery	Familiar	Complete Mastery	Familiar	Complete Mastery	Familiar	Completely Agree	Completely Willing	Completely Willing	Completely Willing	Completely Willing	Completely Willing	Always	Always	Always	Always	Always	Always	Always	Always
17	114	female	Department of Rehabilitation Medicine	2016	Resident Physician	Physician	5	Bachelor's Degree	Complete Mastery	Familiar	Complete Mastery	Complete Mastery	Complete Mastery	Complete Mastery	Complete Mastery	Complete Mastery	Complete Mastery	Completely Agree	Completely Willing	Completely Willing	Completely Willing	Completely Willing	Completely Willing	Always	Always	Always	Always	Always	Always	Always	Always
18	83	female	Department of Rehabilitation Medicine	2016	Resident Physician	Physician	7	Bachelor's Degree	Familiar	Partial Understanding	Familiar	Familiar	Understood	Understood	Familiar	Understood	Understood	Agree	Willing	Willing	Willing	Willing	Willing	Sometimes	Sometimes	Sometimes	Often	Often	Often	Often	Often
19	73	female	Department of Neurology	2012	Attending Physician	Physician	6	Bachelor's Degree	Partial Understanding	Partial Understanding	Understood	Partial Understanding	Not at all familiar	Partial Understanding	Partial Understanding	Not at all familiar	Partial Understanding	Completely Agree	Completely Willing	Completely Willing	Completely Willing	Completely Willing	Completely Willing	Never	Occasionally	Occasionally	Always	Often	Sometimes	Often	Always
20	115	female	Department of Rehabilitation Medicine	2013	Attending Physician	Physician	3	Bachelor's Degree	Complete Mastery	Complete Mastery	Complete Mastery	Complete Mastery	Complete Mastery	Complete Mastery	Complete Mastery	Complete Mastery	Complete Mastery	Completely Agree	Completely Willing	Completely Willing	Completely Willing	Completely Willing	Completely Willing	Always	Always	Always	Always	Always	Always	Always	Always
21	111	male	Department of Rehabilitation Medicine	2018	Junior Technician	Therapist	5	Bachelor's Degree	Complete Mastery	Familiar	Complete Mastery	Complete Mastery	Familiar	Complete Mastery	Complete Mastery	Complete Mastery	Understood	Completely Agree	Completely Willing	Completely Willing	Completely Willing	Completely Willing	Completely Willing	Always	Always	Always	Always	Always	Always	Always	Always
22	106	female	Department of Rehabilitation Medicine	2015	Intermediate Technician	Therapist	8	Bachelor's Degree	Familiar	Familiar	Familiar	Familiar	Familiar	Familiar	Familiar	Familiar	Familiar	Completely Agree	Completely Willing	Completely Willing	Completely Willing	Completely Willing	Completely Willing	Always	Always	Always	Always	Always	Always	Always	Always
23	115	female	Department of Rehabilitation Medicine	2021	Junior Technician	Therapist	1	Bachelor's Degree	Complete Mastery	Complete Mastery	Complete Mastery	Complete Mastery	Complete Mastery	Complete Mastery	Complete Mastery	Complete Mastery	Complete Mastery	Completely Agree	Completely Willing	Completely Willing	Completely Willing	Completely Willing	Completely Willing	Always	Always	Always	Always	Always	Always	Always	Always
24	90	male	Department of Rehabilitation Medicine	2016	Junior Technician	Therapist	7	Bachelor's Degree	Familiar	Familiar	Familiar	Familiar	Familiar	Familiar	Familiar	Familiar	Understood	Agree	Willing	Willing	Willing	Willing	Willing	Often	Often	Often	Often	Often	Often	Often	Sometimes
25	107	male	Department of Rehabilitation Medicine	2016	Junior Technician	Therapist	6	Bachelor's Degree	Complete Mastery	Complete Mastery	Complete Mastery	Complete Mastery	Complete Mastery	Complete Mastery	Complete Mastery	Complete Mastery	Complete Mastery	Completely Agree	Completely Willing	Completely Willing	Completely Willing	Completely Willing	Completely Willing	Often	Often	Often	Often	Often	Often	Often	Often
26	90	female	Department of Rehabilitation Medicine	2022	Registered Nurse	Nurse	0.8	Associate Degree	Understood	Partial Understanding	Familiar	Familiar	Familiar	Familiar	Familiar	Familiar	Understood	Completely Agree	Willing	Willing	Willing	Completely Willing	Willing	Often	Often	Often	Often	Often	Often	Often	Often
27	112	female	Department of Rehabilitation Medicine	2017	Registered Nurse	Nurse	5	Bachelor's Degree	Complete Mastery	Complete Mastery	Complete Mastery	Complete Mastery	Complete Mastery	Complete Mastery	Complete Mastery	Familiar	Familiar	Completely Agree	Completely Willing	Willing	Completely Willing	Completely Willing	Completely Willing	Always	Always	Always	Always	Always	Always	Always	Always
28	109	female	Department of Rehabilitation Medicine	2022	Junior Technician	Therapist	1	Bachelor's Degree	Complete Mastery	Complete Mastery	Complete Mastery	Complete Mastery	Complete Mastery	Complete Mastery	Complete Mastery	Complete Mastery	Understood	Completely Agree	Completely Willing	Completely Willing	Completely Willing	Willing	Completely Willing	Always	Sometimes	Often	Always	Always	Always	Always	Always
29	113	female	Department of Rehabilitation Medicine	2022	Junior Technician	Therapist	1	Bachelor's Degree	Complete Mastery	Complete Mastery	Complete Mastery	Complete Mastery	Complete Mastery	Complete Mastery	Complete Mastery	Complete Mastery	Understood	Completely Agree	Completely Willing	Completely Willing	Completely Willing	Completely Willing	Completely Willing	Always	Always	Always	Always	Always	Always	Always	Always
30	88	female	Department of Rehabilitation Medicine	2018	Registered Nurse	Nurse	5	Bachelor's Degree	Partial Understanding	Familiar	Familiar	Familiar	Understood	Understood	Familiar	Familiar	Familiar	Agree	Willing	Willing	Willing	Willing	Willing	Often	Sometimes	Often	Always	Often	Often	Often	Often
31	115	female	Department of Rehabilitation Medicine	2016	Junior Technician	Therapist	6	Bachelor's Degree	Complete Mastery	Complete Mastery	Complete Mastery	Complete Mastery	Complete Mastery	Complete Mastery	Complete Mastery	Complete Mastery	Complete Mastery	Completely Agree	Completely Willing	Completely Willing	Completely Willing	Completely Willing	Completely Willing	Always	Always	Always	Always	Always	Always	Always	Always
32	105	female	Department of Rehabilitation Medicine	2016	Junior Technician	Therapist	6	Bachelor's Degree	Familiar	Familiar	Familiar	Familiar	Familiar	Familiar	Familiar	Familiar	Familiar	Agree	Completely Willing	Completely Willing	Completely Willing	Completely Willing	Completely Willing	Always	Always	Always	Always	Always	Always	Always	Always
33	115	female	Department of Rehabilitation Medicine	2021	Junior Technician	Therapist	2	Bachelor's Degree	Complete Mastery	Complete Mastery	Complete Mastery	Complete Mastery	Complete Mastery	Complete Mastery	Complete Mastery	Complete Mastery	Complete Mastery	Completely Agree	Completely Willing	Completely Willing	Completely Willing	Completely Willing	Completely Willing	Always	Always	Always	Always	Always	Always	Always	Always
34	92	female	Department of Rehabilitation Medicine	2021	Junior Technician	Therapist	1	Associate Degree	Familiar	Familiar	Familiar	Familiar	Familiar	Familiar	Familiar	Familiar	Familiar	Agree	Willing	Willing	Willing	Willing	Willing	Often	Often	Often	Often	Often	Often	Often	Often
35	69	female	Department of Rehabilitation Medicine	2020	Junior Technician	Therapist	3	Bachelor's Degree	Understood	Understood	Understood	Understood	Partial Understanding	Understood	Understood	Understood	Understood	Agree	Indifferent	Indifferent	Indifferent	Indifferent	Indifferent	Sometimes	Sometimes	Sometimes	Sometimes	Sometimes	Sometimes	Sometimes	Sometimes
36	72	female	Department of Rehabilitation Medicine	2019	Junior Technician	Therapist	4	Bachelor's Degree	Understood	Understood	Understood	Understood	Partial Understanding	Understood	Understood	Understood	Understood	Agree	Willing	Indifferent	Indifferent	Willing	Willing	Sometimes	Sometimes	Sometimes	Sometimes	Sometimes	Sometimes	Sometimes	Sometimes
37	100	male	Department of Rehabilitation Medicine	2012	Junior Technician	Therapist	12	Bachelor's Degree	Familiar	Familiar	Familiar	Familiar	Familiar	Familiar	Familiar	Familiar	Understood	Completely Agree	Completely Willing	Completely Willing	Completely Willing	Completely Willing	Completely Willing	Always	Always	Always	Often	Often	Often	Often	Often
38	85	female	Department of Critical Care Medicine	2014	Attending Physician	Physician	9	Bachelor's Degree	Partial Understanding	Partial Understanding	Familiar	Partial Understanding	Familiar	Familiar	Partial Understanding	Partial Understanding	Partial Understanding	Completely Agree	Completely Willing	Completely Willing	Completely Willing	Completely Willing	Completely Willing	Occasionally	Occasionally	Occasionally	Always	Always	Always	Always	Always
39	69	female	Department of Critical Care Medicine	2015	Attending Physician	Physician	7	Bachelor's Degree	Familiar	Partial Understanding	Understood	Not at all familiar	Partial Understanding	Not at all familiar	Not at all familiar	Not at all familiar	Not at all familiar	Completely Agree	Completely Willing	Completely Willing	Completely Willing	Completely Willing	Completely Willing	Never	Never	Never	Often	Often	Often	Often	Often
40	108	female	Department of Rehabilitation Medicine	2010	Intermediate Technician	Therapist	13	Bachelor's Degree	Complete Mastery	Complete Mastery	Complete Mastery	Complete Mastery	Complete Mastery	Complete Mastery	Familiar	Familiar	Familiar	Completely Agree	Completely Willing	Willing	Completely Willing	Completely Willing	Completely Willing	Always	Occasionally	Always	Always	Always	Always	Always	Always
41	62	female	Department of Critical Care Medicine	2018	Registered Nurse	Nurse	5	Bachelor's Degree	Partial Understanding	Partial Understanding	Partial Understanding	Partial Understanding	Partial Understanding	Partial Understanding	Partial Understanding	Partial Understanding	Partial Understanding	Agree	Willing	Willing	Willing	Willing	Willing	Occasionally	Occasionally	Occasionally	Sometimes	Sometimes	Sometimes	Sometimes	Occasionally
42	115	female	Department of Rehabilitation Medicine	1997	Professor in Nursing	Nurse	7	Bachelor's Degree	Complete Mastery	Complete Mastery	Complete Mastery	Complete Mastery	Complete Mastery	Complete Mastery	Complete Mastery	Complete Mastery	Complete Mastery	Completely Agree	Completely Willing	Completely Willing	Completely Willing	Completely Willing	Completely Willing	Always	Always	Always	Always	Always	Always	Always	Always
43	110	male	Department of Critical Care Medicine	2019	Registered Nurse	Nurse	2	Bachelor's Degree	Familiar	Understood	Complete Mastery	Complete Mastery	Complete Mastery	Familiar	Familiar	Complete Mastery	Complete Mastery	Completely Agree	Completely Willing	Completely Willing	Completely Willing	Completely Willing	Completely Willing	Always	Always	Always	Always	Always	Always	Always	Always
44	71	female	Department of Critical Care Medicine	2018	Registered Nurse	Nurse	4	Bachelor's Degree	Understood	Understood	Familiar	Familiar	Partial Understanding	Partial Understanding	Partial Understanding	Partial Understanding	Partial Understanding	Agree	Willing	Willing	Willing	Willing	Willing	Often	Occasionally	Occasionally	Sometimes	Sometimes	Sometimes	Sometimes	Sometimes
45	88	female	Department of Rehabilitation Medicine	2013	Attending Physician	Physician	7	Bachelor's Degree	Understood	Familiar	Familiar	Familiar	Understood	Understood	Understood	Understood	Understood	Completely Agree	Completely Willing	Completely Willing	Willing	Willing	Willing	Often	Often	Sometimes	Often	Often	Often	Often	Often
46	94	female	Department of Rehabilitation Medicine	2018	Registered Nurse	Nurse	4	Associate Degree	Understood	Partial Understanding	Complete Mastery	Complete Mastery	Understood	Understood	Understood	Familiar	Familiar	Completely Agree	Completely Willing	Completely Willing	Completely Willing	Completely Willing	Completely Willing	Often	Often	Often	Often	Often	Often	Often	Often
47	85	female	Department of Rehabilitation Medicine	2020	Junior Technician	Therapist	3	Bachelor's Degree	Understood	Understood	Familiar	Familiar	Understood	Understood	Understood	Familiar	Understood	Agree	Willing	Willing	Willing	Willing	Willing	Sometimes	Often	Often	Often	Often	Often	Often	Often
48	75	male	Emergency	2007	Associate Professor	Physician	16	Master's Degree	Understood	Partial Understanding	Partial Understanding	Not at all familiar	Not at all familiar	Not at all familiar	Not at all familiar	Not at all familiar	Partial Understanding	Completely Agree	Completely Willing	Completely Willing	Completely Willing	Completely Willing	Completely Willing	Sometimes	Often	Often	Always	Often	Often	Sometimes	Often
49	85	female	Department of Rehabilitation Medicine	2006	Charge Nurse	Nurse	7	Bachelor's Degree	Familiar	Partial Understanding	Complete Mastery	Familiar	Familiar	Familiar	Understood	Understood	Understood	Agree	Willing	Willing	Willing	Willing	Willing	Often	Sometimes	Often	Often	Often	Often	Sometimes	Sometimes
50	108	male	Emergency	2007	Attending Physician	Physician	15	Bachelor's Degree	Familiar	Familiar	Complete Mastery	Complete Mastery	Familiar	Complete Mastery	Partial Understanding	Complete Mastery	Familiar	Completely Agree	Completely Willing	Completely Willing	Completely Willing	Completely Willing	Completely Willing	Always	Always	Always	Always	Always	Always	Always	Always
51	91	male	Department of Rehabilitation Medicine	2013	Attending Physician	Physician	7	Bachelor's Degree	Familiar	Familiar	Familiar	Familiar	Familiar	Familiar	Familiar	Familiar	Familiar	Agree	Willing	Willing	Willing	Willing	Willing	Often	Often	Often	Often	Often	Often	Sometimes	Often
52	81	male	Emergency	2007	Attending Physician	Physician	16	Bachelor's Degree	Partial Understanding	Understood	Partial Understanding	Partial Understanding	Understood	Understood	Understood	Partial Understanding	Understood	Completely Agree	Completely Willing	Completely Willing	Completely Willing	Completely Willing	Completely Willing	Sometimes	Sometimes	Sometimes	Often	Often	Often	Often	Sometimes
53	73	male	Department of Neurosurgery	2018	Professor	Physician	15	Master's Degree	Partial Understanding	Partial Understanding	Partial Understanding	Partial Understanding	Understood	Partial Understanding	Partial Understanding	Partial Understanding	Partial Understanding	Completely Agree	Completely Willing	Completely Willing	Completely Willing	Completely Willing	Completely Willing	Sometimes	Sometimes	Sometimes	Sometimes	Sometimes	Sometimes	Sometimes	Sometimes
54	92	male	Department of Neurosurgery	2010	Attending Physician	Physician	12	Bachelor's Degree	Familiar	Familiar	Familiar	Familiar	Familiar	Familiar	Familiar	Familiar	Familiar	Agree	Willing	Willing	Willing	Willing	Willing	Often	Often	Often	Often	Often	Often	Often	Often
55	70	male	Department of Neurosurgery	2013	Attending Physician	Physician	10	Master's Degree研究生	Understood	Partial Understanding	Familiar	Partial Understanding	Understood	Not at all familiar	Partial Understanding	Partial Understanding	Not at all familiar	Completely Agree	Completely Willing	Completely Willing	Completely Willing	Completely Willing	Completely Willing	Never	Never	Never	Always	Often	Often	Sometimes	Never
56	78	male	Department of Neurosurgery	2015	Attending Physician	Physician	6	Master's Degree	Understood	Partial Understanding	Understood	Understood	Understood	Understood	Understood	Partial Understanding	Partial Understanding	Completely Agree	Completely Willing	Willing	Willing	Willing	Willing	Often	Sometimes	Sometimes	Often	Often	Often	Sometimes	Sometimes
57	83	female	Department of Neurosurgery	2010	Charge Nurse	Nurse	4	Master's Degree	Familiar	Partial Understanding	Familiar	Familiar	Partial Understanding	Partial Understanding	Understood	Partial Understanding	Partial Understanding	Completely Agree	Completely Willing	Completely Willing	Completely Willing	Completely Willing	Completely Willing	Always	Never	Always	Often	Often	Often	Often	Never
58	94	female	Department of Neurology	2012	Associate Professor	Physician	9	Doctoral Degree	Familiar	Familiar	Familiar	Familiar	Understood	Familiar	Familiar	Understood	Understood	Completely Agree	Willing	Willing	Willing	Willing	Willing	Often	Often	Often	Always	Always	Always	Often	Always
59	84	female	Department of Neurosurgery	2002	Charge Nurse	Nurse	20	Bachelor's Degree	Familiar	Familiar	Familiar	Familiar	Familiar	Partial Understanding	Partial Understanding	Partial Understanding	Partial Understanding	Agree	Willing	Willing	Willing	Willing	Willing	Often	Often	Often	Often	Often	Often	Often	Often
60	111	female	Department of Neurology	2002	Professor	Physician	21	Bachelor's Degree	Familiar	Familiar	Complete Mastery	Complete Mastery	Complete Mastery	Complete Mastery	Familiar	Familiar	Complete Mastery	Completely Agree	Completely Willing	Completely Willing	Completely Willing	Completely Willing	Completely Willing	Always	Always	Always	Always	Always	Always	Always	Always
61	88	female	Department of Neurology	2009	Registered Nurse	Nurse	14	Associate Degree	Partial Understanding	Understood	Understood	Understood	Understood	Understood	Understood	Understood	Understood	Completely Agree	Completely Willing	Completely Willing	Completely Willing	Completely Willing	Completely Willing	Often	Often	Often	Often	Often	Often	Often	Often
62	73	female	Department of Neurology	2001	Charge Nurse	Nurse	13	Bachelor's Degree	Understood	Understood	Understood	Partial Understanding	Partial Understanding	Partial Understanding	Partial Understanding	Partial Understanding	Partial Understanding	Completely Agree	Completely Willing	Completely Willing	Completely Willing	Completely Willing	Completely Willing	Sometimes	Occasionally	Occasionally	Sometimes	Sometimes	Sometimes	Sometimes	Sometimes
63	103	female	Department of Neurology	2008	Attending Physician	Physician	15	Bachelor's Degree	Complete Mastery	Familiar	Complete Mastery	Complete Mastery	Complete Mastery	Complete Mastery	Familiar	Understood	Familiar	Completely Agree	Completely Willing	Completely Willing	Completely Willing	Completely Willing	Completely Willing	Always	Sometimes	Occasionally	Always	Always	Often	Always	Often
64	69	female	Department of Neurology	2000	Associate Professor in Nursing	Nurse	9	Bachelor's Degree	Familiar	Partial Understanding	Complete Mastery	Complete Mastery	Not at all familiar	Understood	Partial Understanding	Not at all familiar	Not at all familiar	Completely Agree	Completely Willing	Willing	Willing	Completely Unwilling	Completely Unwilling	Always	Never	Often	Occasionally	Sometimes	Often	Sometimes	Sometimes
65	84	female	Department of Neurology	2019	Registered Nurse	Nurse	3	Bachelor's Degree	Partial Understanding	Not at all familiar	Understood	Partial Understanding	Not at all familiar	Not at all familiar	Partial Understanding	Not at all familiar	Not at all familiar	Completely Agree	Completely Willing	Completely Willing	Completely Willing	Completely Willing	Completely Willing	Always	Always	Always	Always	Always	Always	Always	Always
66	85	female	Department of Neurology	2006	Charge Nurse	Nurse	15	Bachelor's Degree	Familiar	Familiar	Familiar	Familiar	Familiar	Understood	Understood	Understood	Understood	Completely Agree	Willing	Willing	Willing	Willing	Willing	Often	Often	Often	Sometimes	Sometimes	Sometimes	Sometimes	Often
67	83	female	Department of Neurology	2011	Associate Professor	Physician	12	Master's Degree	Familiar	Understood	Understood	Understood	Understood	Understood	Understood	Understood	Understood	Agree	Willing	Willing	Willing	Willing	Willing	Often	Often	Often	Often	Often	Often	Often	Sometimes
68	61	female	Department of Neurosurgery	2012	Registered Nurse	Nurse	9	Bachelor's Degree	Partial Understanding	Not at all familiar	Partial Understanding	Partial Understanding	Partial Understanding	Not at all familiar	Partial Understanding	Partial Understanding	Not at all familiar	Completely Agree	Willing	Willing	Willing	Indifferent	Willing	Often	Sometimes	Sometimes	Occasionally	Sometimes	Sometimes	Sometimes	Never
69	110	female	Department of Neurology	2005	Registered Nurse	Nurse	15	Bachelor's Degree	Complete Mastery	Complete Mastery	Complete Mastery	Familiar	Familiar	Familiar	Familiar	Familiar	Complete Mastery	Completely Agree	Completely Willing	Completely Willing	Completely Willing	Completely Willing	Completely Willing	Always	Always	Always	Always	Always	Always	Always	Always
70	103	female	Department of Neurology	2004	Charge Nurse	Nurse	18	Bachelor's Degree	Familiar	Familiar	Familiar	Familiar	Familiar	Familiar	Familiar	Familiar	Familiar	Agree	Willing	Completely Willing	Completely Willing	Completely Willing	Completely Willing	Always	Always	Always	Always	Always	Always	Always	Often
71	103	female	Department of Neurology	2008	Registered Nurse	Nurse	24	Bachelor's Degree	Familiar	Familiar	Complete Mastery	Familiar	Complete Mastery	Familiar	Familiar	Familiar	Familiar	Completely Agree	Completely Willing	Completely Willing	Completely Willing	Willing	Completely Willing	Always	Often	Often	Often	Often	Always	Always	Always
72	103	female	Department of Neurology	2001	Charge Nurse	Nurse	21	Bachelor's Degree	Familiar	Familiar	Complete Mastery	Complete Mastery	Familiar	Familiar	Complete Mastery	Familiar	Familiar	Completely Agree	Completely Willing	Completely Willing	Willing	Willing	Willing	Always	Often	Always	Always	Often	Often	Always	Always
73	98	female	Department of Neurology	2006	Charge Nurse	Nurse	16	Bachelor's Degree	Familiar	Familiar	Familiar	Familiar	Familiar	Familiar	Familiar	Familiar	Familiar	Completely Agree	Completely Willing	Completely Willing	Willing	Willing	Willing	Often	Sometimes	Often	Always	Always	Always	Always	Often
74	89	male	Department of Neurology	2011	Attending Physician	Physician	12	Bachelor's Degree	Familiar	Understood	Familiar	Partial Understanding	Familiar	Understood	Understood	Partial Understanding	Familiar	Completely Agree	Completely Willing	Completely Willing	Completely Willing	Completely Willing	Completely Willing	Often	Occasionally	Always	Often	Often	Often	Occasionally	Always
75	48	female	EICU	2007	Associate Professor	Physician	16	Bachelor's Degree	Not at all familiar	Not at all familiar	Partial Understanding	Not at all familiar	Familiar	Partial Understanding	Not at all familiar	Not at all familiar	Not at all familiar	Agree	Willing	Willing	Willing	Completely Willing	Completely Willing	Never	Never	Never	Never	Never	Never	Never	Never
76	51	female	EICU	2015	Attending Physician	Physician	4	Bachelor's Degree	Partial Understanding	Partial Understanding	Partial Understanding	Partial Understanding	Not at all familiar	Not at all familiar	Not at all familiar	Not at all familiar	Not at all familiar	Completely Agree	Completely Willing	Completely Willing	Completely Willing	Completely Willing	Completely Willing	Never	Never	Never	Never	Never	Never	Never	Never
77	57	female	Emergency	2014	Attending Physician	Physician	8	Bachelor's Degree	Not at all familiar	Not at all familiar	Not at all familiar	Not at all familiar	Partial Understanding	Not at all familiar	Not at all familiar	Not at all familiar	Not at all familiar	Agree	Completely Willing	Completely Willing	Completely Willing	Willing	Completely Willing	Never	Never	Never	Often	Often	Never	Often	Sometimes
78	80	male	eicu	2019	Resident Physician	Physician	0.5	Bachelor's Degree	Not at all familiar	Not at all familiar	Partial Understanding	Not at all familiar	Partial Understanding	Not at all familiar	Partial Understanding	Not at all familiar	Partial Understanding	Completely Agree	Completely Willing	Completely Willing	Completely Willing	Completely Willing	Completely Willing	Always	Occasionally	Always	Always	Always	Always	Always	Always
79	60	female	Eicu	1997	Associate Professor in Nursing	Nurse	26	Bachelor's Degree	Partial Understanding	Not at all familiar	Partial Understanding	Partial Understanding	Partial Understanding	Not at all familiar	Not at all familiar	Not at all familiar	Not at all familiar	Completely Agree	Completely Willing	Completely Willing	Completely Willing	Completely Willing	Completely Willing	Sometimes	Never	Never	Never	Sometimes	Sometimes	Sometimes	Occasionally
80	78	male	EICU	2011	Attending Physician	Physician	11	Bachelor's Degree	Partial Understanding	Partial Understanding	Partial Understanding	Partial Understanding	Partial Understanding	Partial Understanding	Partial Understanding	Not at all familiar	Partial Understanding	Completely Agree	Completely Willing	Completely Willing	Completely Willing	Completely Willing	Completely Willing	Always	Never	Always	Often	Often	Often	Often	Often
81	115	male	Department of Neurology	2018	Resident Physician	Physician	5	Master's Degree研究生	Complete Mastery	Complete Mastery	Complete Mastery	Complete Mastery	Complete Mastery	Complete Mastery	Complete Mastery	Complete Mastery	Complete Mastery	Completely Agree	Completely Willing	Completely Willing	Completely Willing	Completely Willing	Completely Willing	Always	Always	Always	Always	Always	Always	Always	Always
82	104	male	Department of Neurology	2013	Attending Physician	Physician	6	Bachelor's Degree	Familiar	Familiar	Familiar	Familiar	Familiar	Familiar	Familiar	Understood	Understood	Completely Agree	Completely Willing	Completely Willing	Completely Willing	Completely Willing	Completely Willing	Always	Always	Always	Always	Always	Always	Always	Always
83	82	female	Emergency	2004	Associate Professor	Physician	19	Bachelor's Degree	Understood	Partial Understanding	Partial Understanding	Partial Understanding	Understood	Partial Understanding	Partial Understanding	Partial Understanding	Partial Understanding	Completely Agree	Completely Willing	Completely Willing	Completely Willing	Completely Willing	Completely Willing	Sometimes	Sometimes	Often	Always	Often	Sometimes	Always	Always
84	73	female	Department of Neurology	2021	Registered Nurse	Nurse	1	Associate Degree	Partial Understanding	Partial Understanding	Understood	Partial Understanding	Partial Understanding	Partial Understanding	Partial Understanding	Partial Understanding	Partial Understanding	Completely Agree	Completely Willing	Completely Willing	Completely Willing	Completely Willing	Completely Willing	Occasionally	Occasionally	Sometimes	Occasionally	Often	Often	Often	Sometimes
85	92	female	Department of Neurology	2003	Professor	Physician	20	Master's Degree	Familiar	Understood	Familiar	Understood	Understood	Familiar	Understood	Understood	Understood	Completely Agree	Completely Willing	Completely Willing	Completely Willing	Completely Willing	Willing	Always	Sometimes	Sometimes	Always	Always	Always	Sometimes	Often
86	83	female	Emergency	2014	Charge Nurse	Nurse	7	Bachelor's Degree	Understood	Partial Understanding	Partial Understanding	Partial Understanding	Understood	Partial Understanding	Understood	Partial Understanding	Partial Understanding	Completely Agree	Completely Willing	Completely Willing	Completely Willing	Completely Willing	Completely Willing	Often	Often	Often	Often	Often	Often	Often	Often
87	114	female	Emergency	2016	Registered Nurse	Nurse	5	Bachelor's Degree	Complete Mastery	Complete Mastery	Familiar	Complete Mastery	Complete Mastery	Complete Mastery	Complete Mastery	Complete Mastery	Complete Mastery	Completely Agree	Completely Willing	Completely Willing	Completely Willing	Completely Willing	Completely Willing	Always	Always	Always	Always	Always	Always	Always	Always
88	77	female	Resuscitation Room	2022	Registered Nurse	Nurse	1	Associate Degree	Familiar	Understood	Partial Understanding	Understood	Partial Understanding	Understood	Understood	Partial Understanding	Partial Understanding	Completely Agree	Completely Willing	Completely Willing	Completely Willing	Completely Willing	Completely Willing	Sometimes	Sometimes	Often	Never	Occasionally	Sometimes	Always	Occasionally
89	70	female	Emergency	2021	Registered Nurse	Nurse	2	Associate Degree	Familiar	Understood	Partial Understanding	Understood	Understood	Partial Understanding	Partial Understanding	Partial Understanding	Partial Understanding	Completely Agree	Completely Willing	Completely Willing	Completely Willing	Willing	Willing	Occasionally	Sometimes	Often	Occasionally	Occasionally	Occasionally	Occasionally	Occasionally
90	79	male	Emergency	2021	Registered Nurse	Nurse	2	Associate Degree	Partial Understanding	Understood	Partial Understanding	Partial Understanding	Partial Understanding	Partial Understanding	Partial Understanding	Understood	Understood	Completely Agree	Willing	Completely Willing	Completely Willing	Completely Willing	Completely Willing	Occasionally	Sometimes	Often	Often	Often	Often	Often	Often
91	66	female	Emergency	2020	Registered Nurse	Nurse	2	Bachelor's Degree	Partial Understanding	Not at all familiar	Understood	Understood	Understood	Not at all familiar	Partial Understanding	Partial Understanding	Partial Understanding	Completely Agree	Completely Willing	Willing	Willing	Willing	Willing	Occasionally	Never	Sometimes	Occasionally	Often	Sometimes	Sometimes	Sometimes
92	73	female	Emergency	2016	Registered Nurse	Nurse	3	Bachelor's Degree	Understood	Understood	Understood	Complete Mastery	Familiar	Understood	Partial Understanding	Partial Understanding	Understood	Completely Agree	Willing	Willing	Completely Willing	Completely Willing	Completely Willing	Sometimes	Never	Never	Never	Sometimes	Sometimes	Sometimes	Occasionally
93	64	female	Resuscitation Room	2019	Registered Nurse	Nurse	3	Bachelor's Degree	Partial Understanding	Partial Understanding	Partial Understanding	Partial Understanding	Partial Understanding	Partial Understanding	Partial Understanding	Partial Understanding	Partial Understanding	Completely Agree	Completely Willing	Completely Willing	Completely Willing	Completely Willing	Completely Willing	Occasionally	Occasionally	Occasionally	Occasionally	Occasionally	Occasionally	Occasionally	Occasionally
94	75	female	Emergency	2021	Registered Nurse	Nurse	2	Associate Degree	Understood	Understood	Understood	Understood	Understood	Understood	Understood	Understood	Understood	Agree	Willing	Willing	Willing	Willing	Willing	Sometimes	Sometimes	Sometimes	Sometimes	Sometimes	Sometimes	Sometimes	Sometimes
95	66	male	Department of Neurology	2019	Resident Physician	Physician	3	Bachelor's Degree	Not at all familiar	Not at all familiar	Not at all familiar	Not at all familiar	Understood	Not at all familiar	Not at all familiar	Partial Understanding	Understood	Completely Agree	Willing	Willing	Willing	Completely Willing	Completely Willing	Occasionally	Occasionally	Occasionally	Sometimes	Sometimes	Sometimes	Always	Always
96	64	female	Emergency	2013	Registered Nurse	Nurse	13	Bachelor's Degree	Understood	Understood	Not at all familiar	Not at all familiar	Understood	Not at all familiar	Not at all familiar	Not at all familiar	Not at all familiar	Completely Agree	Completely Willing	Completely Willing	Completely Willing	Completely Willing	Completely Willing	Occasionally	Occasionally	Always	Occasionally	Occasionally	Occasionally	Occasionally	Occasionally
97	80	female	Emergency	2012	Charge Nurse	Nurse	4	Bachelor's Degree	Understood	Understood	Understood	Understood	Understood	Understood	Familiar	Understood	Understood	Completely Agree	Willing	Willing	Willing	Willing	Willing	Sometimes	Never	Often	Sometimes	Often	Often	Often	Often
98	59	female	Emergency	2014	Registered Nurse	Nurse	5	Bachelor's Degree	Partial Understanding	Partial Understanding	Partial Understanding	Partial Understanding	Partial Understanding	Partial Understanding	Partial Understanding	Partial Understanding	Partial Understanding	Agree	Willing	Willing	Completely Willing	Willing	Willing	Occasionally	Occasionally	Occasionally	Occasionally	Occasionally	Occasionally	Occasionally	Occasionally
99	75	female	Emergency	2021	Registered Nurse	Nurse	2	Bachelor's Degree	Understood	Understood	Understood	Understood	Understood	Understood	Understood	Understood	Understood	Agree	Willing	Willing	Willing	Willing	Willing	Sometimes	Sometimes	Sometimes	Sometimes	Sometimes	Sometimes	Sometimes	Sometimes
100	90	female	Emergency	2019	Registered Nurse	Nurse	3	Associate Degree	Familiar	Familiar	Familiar	Familiar	Familiar	Familiar	Familiar	Familiar	Familiar	Agree	Indifferent	Willing	Willing	Willing	Indifferent	Often	Often	Often	Often	Often	Often	Often	Often
101	68	female	Emergency	2015	Registered Nurse	Nurse	3	Bachelor's Degree	Partial Understanding	Partial Understanding	Understood	Understood	Partial Understanding	Partial Understanding	Partial Understanding	Partial Understanding	Partial Understanding	Agree	Willing	Willing	Willing	Willing	Willing	Sometimes	Sometimes	Sometimes	Sometimes	Sometimes	Sometimes	Sometimes	Sometimes
102	84	female	Emergency	2021	Registered Nurse	Nurse	2	Associate Degree	Familiar	Familiar	Familiar	Familiar	Familiar	Familiar	Familiar	Familiar	Familiar	Agree	Willing	Willing	Willing	Willing	Willing	Sometimes	Sometimes	Sometimes	Sometimes	Sometimes	Sometimes	Sometimes	Sometimes
103	59	male	Emergency	2015	Attending Physician	Physician	8	Bachelor's Degree	Partial Understanding	Partial Understanding	Not at all familiar	Not at all familiar	Partial Understanding	Not at all familiar	Not at all familiar	Not at all familiar	Not at all familiar	Completely Agree	Completely Willing	Completely Willing	Completely Willing	Completely Willing	Completely Willing	Never	Never	Never	Always	Always	Occasionally	Never	Never
104	65	female	Emergency	2018	Registered Nurse	Nurse	4	Associate Degree	Understood	Understood	Understood	Partial Understanding	Familiar	Partial Understanding	Partial Understanding	Partial Understanding	Partial Understanding	Agree	Willing	Willing	Willing	Willing	Willing	Occasionally	Occasionally	Occasionally	Occasionally	Sometimes	Sometimes	Occasionally	Occasionally
105	74	male	Emergency	2015	Attending Physician	Physician	5	Bachelor's Degree	Partial Understanding	Partial Understanding	Not at all familiar	Not at all familiar	Familiar	Not at all familiar	Partial Understanding	Not at all familiar	Not at all familiar	Completely Agree	Willing	Willing	Willing	Completely Willing	Completely Willing	Occasionally	Occasionally	Often	Always	Always	Always	Often	Always
106	75	male	Department of Critical Care Medicine	2017	Resident Physician	Physician	5	Bachelor's Degree	Understood	Understood	Understood	Understood	Understood	Partial Understanding	Partial Understanding	Partial Understanding	Partial Understanding	Completely Agree	Willing	Willing	Willing	Willing	Willing	Sometimes	Often	Sometimes	Often	Often	Sometimes	Sometimes	Sometimes
107	86	female	Department of Critical Care Medicine	2009	Associate Professor in Nursing	Nurse	10	Bachelor's Degree	Familiar	Complete Mastery	Familiar	Familiar	Familiar	Understood	Familiar	Familiar	Understood	Agree	Willing	Completely Willing	Willing	Indifferent	Willing	Often	Sometimes	Sometimes	Often	Often	Sometimes	Sometimes	Sometimes
108	82	female	Department of Critical Care Medicine	2010	Charge Nurse	Nurse	13	Bachelor's Degree	Understood	Understood	Understood	Understood	Understood	Understood	Understood	Understood	Understood	Agree	Willing	Willing	Willing	Willing	Willing	Often	Often	Often	Sometimes	Often	Often	Often	Often
109	62	male	Department of Critical Care Medicine	2020	Resident Physician	Physician	2	Master's Degree	Partial Understanding	Not at all familiar	Not at all familiar	Partial Understanding	Partial Understanding	Understood	Understood	Partial Understanding	Understood	Completely Agree	Willing	Indifferent	Willing	Willing	Willing	Never	Never	Occasionally	Often	Sometimes	Sometimes	Occasionally	Sometimes
110	73	female	Department of Critical Care Medicine	2015	Registered Nurse	Nurse	8	Bachelor's Degree	Understood	Understood	Understood	Understood	Understood	Understood	Understood	Understood	Understood	Completely Agree	Completely Willing	Completely Willing	Completely Willing	Completely Willing	Completely Willing	Sometimes	Never	Occasionally	Occasionally	Occasionally	Occasionally	Occasionally	Occasionally
111	68	female	Department of Critical Care Medicine	2014	Attending Physician	Physician	8	Bachelor's Degree	Partial Understanding	Not at all familiar	Familiar	Not at all familiar	Partial Understanding	Not at all familiar	Not at all familiar	Not at all familiar	Not at all familiar	Completely Agree	Completely Willing	Completely Willing	Completely Willing	Completely Willing	Completely Willing	Never	Never	Never	Often	Always	Always	Occasionally	Always
112	90	female	Department of Critical Care Medicine	2016	Resident Physician	Physician	6	Bachelor's Degree	Familiar	Understood	Familiar	Understood	Understood	Understood	Understood	Understood	Understood	Completely Agree	Completely Willing	Completely Willing	Completely Willing	Completely Willing	Completely Willing	Sometimes	Occasionally	Sometimes	Always	Always	Always	Sometimes	Always
113	96	female	Department of Critical Care Medicine	2014	Registered Nurse	Nurse	9	Bachelor's Degree	Familiar	Familiar	Familiar	Familiar	Familiar	Familiar	Familiar	Understood	Understood	Completely Agree	Completely Willing	Completely Willing	Completely Willing	Completely Willing	Completely Willing	Often	Often	Often	Often	Often	Often	Often	Often
114	72	male	Department of Critical Care Medicine	2012	Registered Nurse	Nurse	10	Bachelor's Degree	Understood	Partial Understanding	Familiar	Familiar	Understood	Understood	Partial Understanding	Partial Understanding	Partial Understanding	Completely Agree	Willing	Completely Willing	Completely Willing	Willing	Willing	Sometimes	Occasionally	Occasionally	Occasionally	Sometimes	Sometimes	Sometimes	Occasionally
115	67	male	Department of Critical Care Medicine	2015	Resident Physician	Physician	7	Bachelor's Degree	Familiar	Not at all familiar	Understood	Partial Understanding	Partial Understanding	Partial Understanding	Understood	Understood	Understood	Agree	Willing	Willing	Willing	Willing	Willing	Sometimes	Occasionally	Sometimes	Occasionally	Occasionally	Occasionally	Sometimes	Sometimes
116	99	female	Department of Critical Care Medicine	2017	Registered Nurse	Nurse	6	Bachelor's Degree	Familiar	Familiar	Familiar	Familiar	Understood	Partial Understanding	Partial Understanding	Understood	Understood	Completely Agree	Completely Willing	Completely Willing	Completely Willing	Completely Willing	Completely Willing	Always	Always	Always	Always	Always	Always	Always	Always
117	73	female	Department of Critical Care Medicine	2018	Registered Nurse	Nurse	4	Bachelor's Degreek	Familiar	Familiar	Partial Understanding	Partial Understanding	Partial Understanding	Partial Understanding	Partial Understanding	Partial Understanding	Partial Understanding	Completely Agree	Completely Willing	Willing	Willing	Willing	Willing	Often	Sometimes	Sometimes	Sometimes	Sometimes	Sometimes	Sometimes	Sometimes
118	100	female	Department of Critical Care Medicine	2003	Professor	Physician	20	Master's Degree	Familiar	Familiar	Familiar	Familiar	Familiar	Familiar	Understood	Familiar	Familiar	Completely Agree	Completely Willing	Completely Willing	Completely Willing	Completely Willing	Completely Willing	Often	Sometimes	Often	Always	Always	Always	Always	Often
119	69	female	Department of Critical Care Medicine	2012	Charge Nurse	Nurse	10	Bachelor's Degree	Understood	Understood	Understood	Understood	Understood	Understood	Understood	Understood	Understood	Agree	Willing	Willing	Willing	Willing	Willing	Often	Occasionally	Occasionally	Occasionally	Occasionally	Occasionally	Occasionally	Occasionally
120	90	female	Department of Neurology	2003	Charge Nurse	Nurse	20	Bachelor's Degree	Understood	Familiar	Complete Mastery	Complete Mastery	Familiar	Familiar	Familiar	Partial Understanding	Not at all familiar	Completely Agree	Completely Willing	Completely Willing	Completely Willing	Completely Willing	Completely Willing	Often	Never	Occasionally	Always	Always	Always	Often	Occasionally
121	115	female	Department of Rehabilitation Medicine	2016	Resident Physician	Physician	6	Bachelor's Degree	Complete Mastery	Complete Mastery	Complete Mastery	Complete Mastery	Complete Mastery	Complete Mastery	Complete Mastery	Complete Mastery	Complete Mastery	Completely Agree	Completely Willing	Completely Willing	Completely Willing	Completely Willing	Completely Willing	Always	Always	Always	Always	Always	Always	Always	Always
122	79	female	Department of Rehabilitation Medicine	2016	Resident Physician	Physician	4	Bachelor's Degree	Familiar	Understood	Familiar	Familiar	Familiar	Familiar	Familiar	Understood	Understood	Agree	Willing	Willing	Indifferent	Willing	Willing	Sometimes	Occasionally	Occasionally	Often	Often	Sometimes	Occasionally	Sometimes
123	112	female	Department of Rehabilitation Medicine	2015	Resident Physician	Physician	8	Bachelor's Degree	Complete Mastery	Complete Mastery	Complete Mastery	Complete Mastery	Complete Mastery	Complete Mastery	Complete Mastery	Complete Mastery	Complete Mastery	Completely Agree	Completely Willing	Completely Willing	Completely Willing	Completely Willing	Completely Willing	Always	Often	Often	Always	Always	Always	Often	Always

## Sheet: Sheet2
Serial number
Score
1. What is your gender:
1. What department do you work in:
1. What is your year of employment:
1. What is your professional title:
1. What is your position (doctor, nursing, etc.):
1. How many years have you worked in your current department:
1. What is your level of education:
2. Do you know what situations can cause hemiplegic shoulder pain?
3. Do you know the incidence rate of hemiplegic shoulder pain?
4. Do you know about the proper positioning of the unaffected limb?
5. Do you know how to position the hemiplegic upper limb when sitting or standing?
6. Do you know how to determine if a patient has a shoulder dislocation?
7. Do you know the definition of shoulder-hand syndrome?
8. Do you know how to alleviate hemiplegic shoulder pain?
9. Do you know the timing for wearing a shoulder support?
10. Do you know the timing for applying medication for pain relief with a hemiplegic shoulder support?
11. Do you think rehabilitation education is meaningful?
12. Are you willing to educate patients on proper limb positioning?
13. Are you willing to instruct patients on wearing a shoulder support?
14. If you see patients wearing a shoulder support incorrectly, are you willing to correct it?
15. Do you think it is necessary to participate in learning about hemiplegic shoulder pain knowledge?
16. Are you willing to provide psychological counseling for patients with hemiplegic shoulder pain?
17. Do you guide patients on proper limb positioning in your work?
18. Do you instruct patients on wearing a shoulder support in your work?
19. If you see patients wearing a shoulder support incorrectly in your work, are you willing to correct it?
20. Do you assess the muscle strength on the hemiplegic side of patients in your work?
21. Do you assess the swelling of the hemiplegic limb in patients in your work?
22. Do you assess the pain of the hemiplegic limb in patients in your work?
23. Do you provide psychological counseling for patients with hemiplegic shoulder pain?
24. Do you treat patients with hemiplegic shoulder pain?
